# Supplementary material for: A new regulatory mechanism of protein phosphatase 2A activity via SET in acute myeloid leukemia
Source: PubMed Central journal article supplement (PMC6949222; doi:10.1038/s41408-019-0270-0), 2020-01-08
Supplement: 41408_2019_270_MOESM1_ESM.pdf [file 41408_2019_270_MOESM1_ESM.pdf]

**A**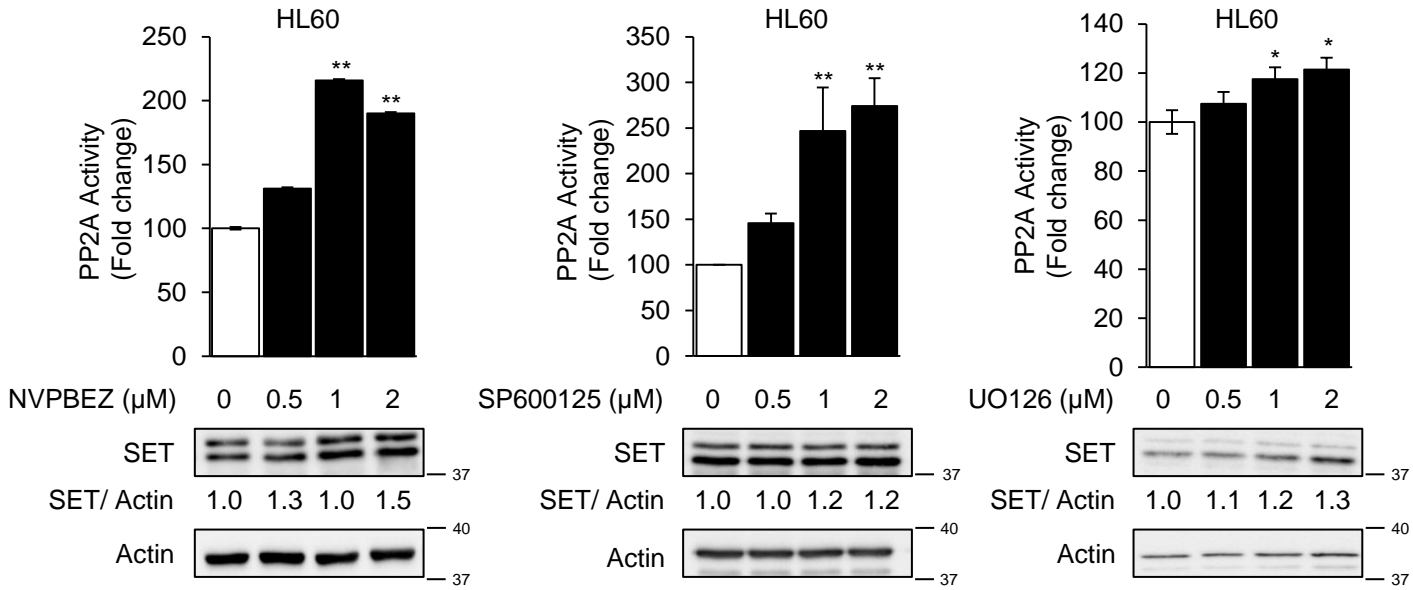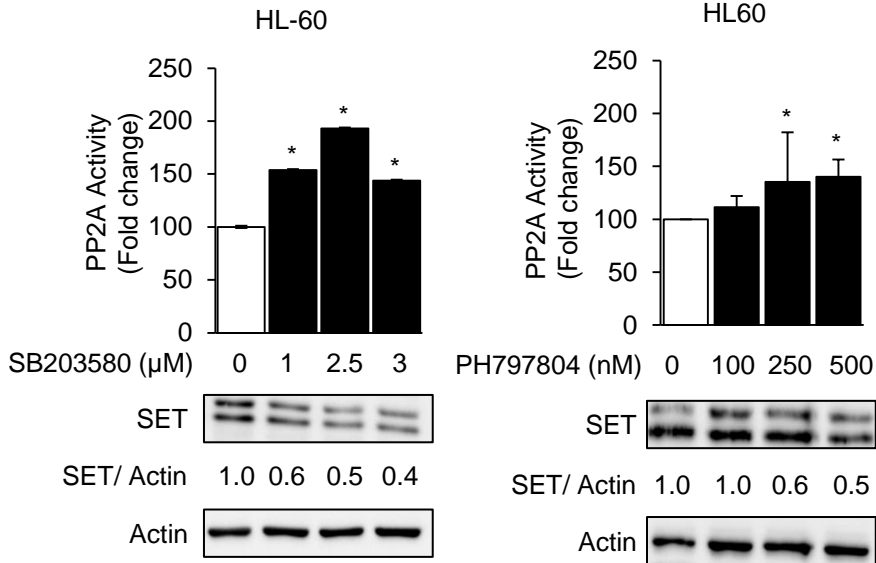**B**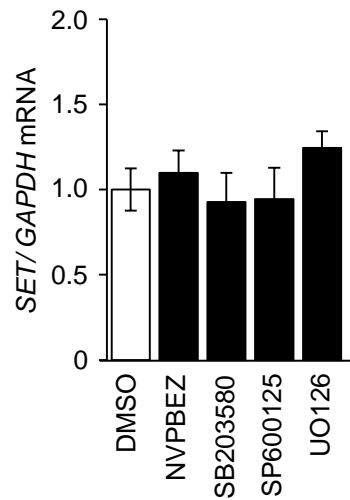

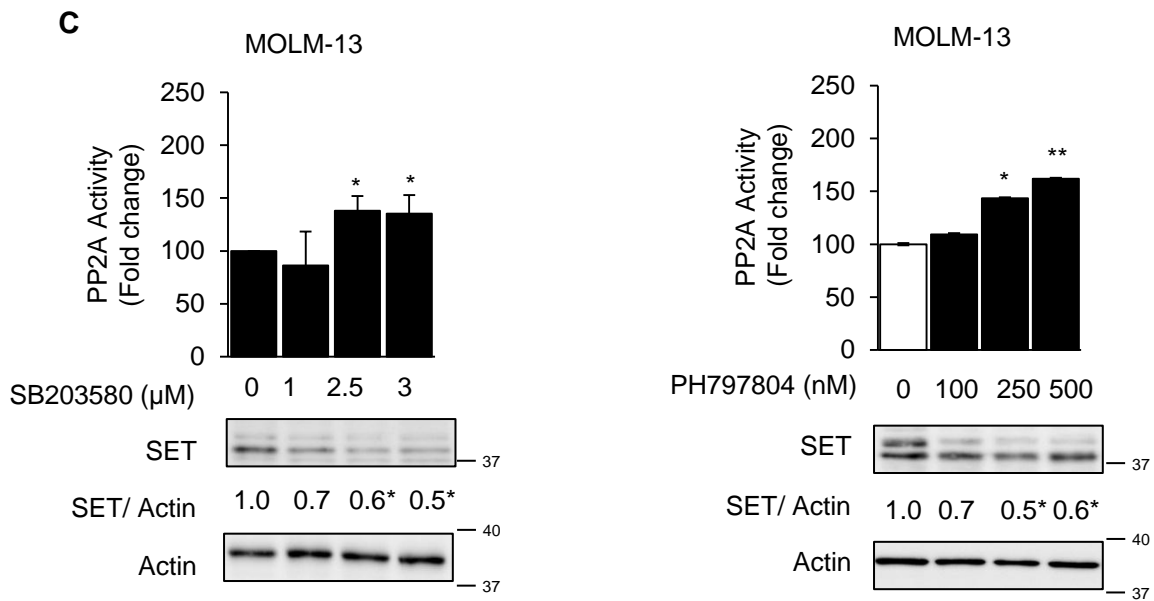

**Figure S1. p38MAPK inhibition decreases SET oncoprotein, increasing PP2A activity in AML cells.** HL60 cell line was treated with NVPBEZ (0.5, 1 and 2 μM, PI3K inhibitor), SB203580 (1, 2.5 and 3 μM, p38MAPK Inhibitor), PH797904 (100, 250 and 500 nM, p38MAPK inhibitor), SP600125 (0.5, 1 and 2 μM, JNK inhibitor) and UO126 (0.5, 1 and 2 μM, ERK inhibitor) for 24h. **(A)** Protein expression were analyzed by western blot. Measurement of PP2A activity by immunoprecipitation and phosphatase assay. **(B)** Quantitative RT-PCR analysis of the SET gene after treatment with NVPBEZ (1μM, PI3K inhibitor), SB203580 (2.5μM, p38 Inhibitor), PH797904 (250nM, p38MAPK inhibitor), SP600125 (1μM, JNK inhibitor) and UO126 (1μM, ERK inhibitor) for 24h. **(C)** MOLM-13 cell line was treated with SB203580 (1, 2.5 and 3 μM, p38MAPK Inhibitor) and PH797904 (100, 250 and 500 nM, p38MAPK inhibitor) for 24h. Protein expression were analyzed by western blot. Measurement of PP2A activity by immunoprecipitation and phosphatase assay. The results are corrected by the specific loading control and are expressed as fold-change of the control, which are assigned a value of 1 and are mean values±SEM. Experiments were performed in triplicate four times. \* $p < 0.05$ .

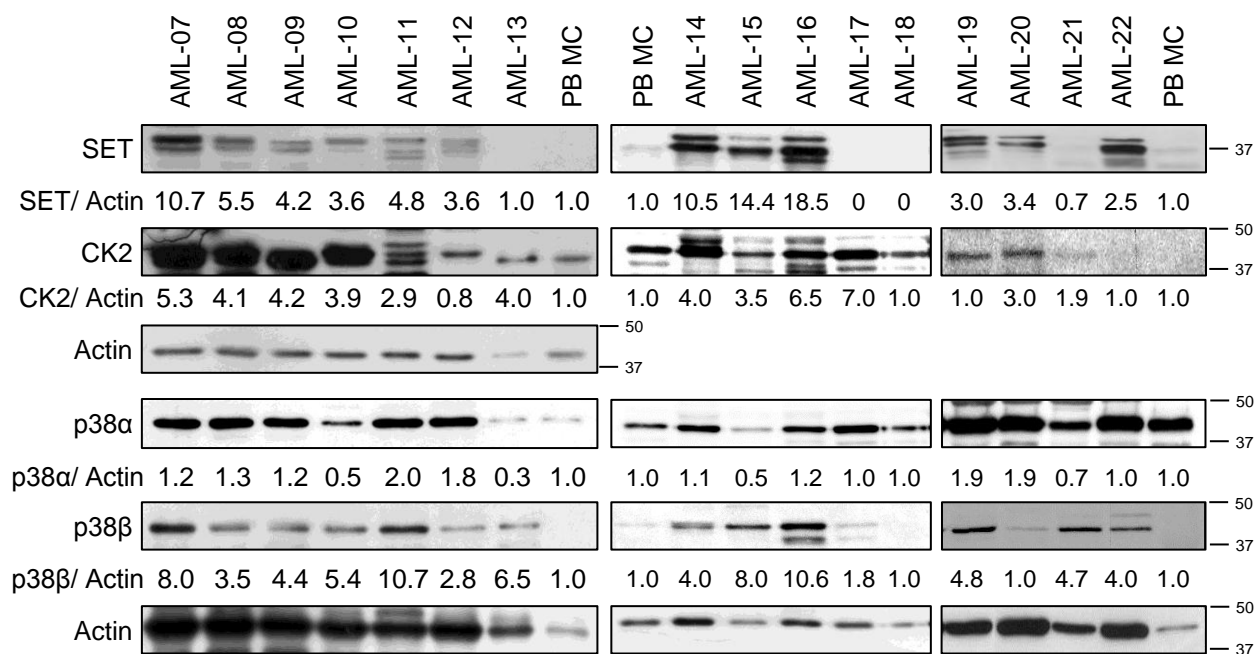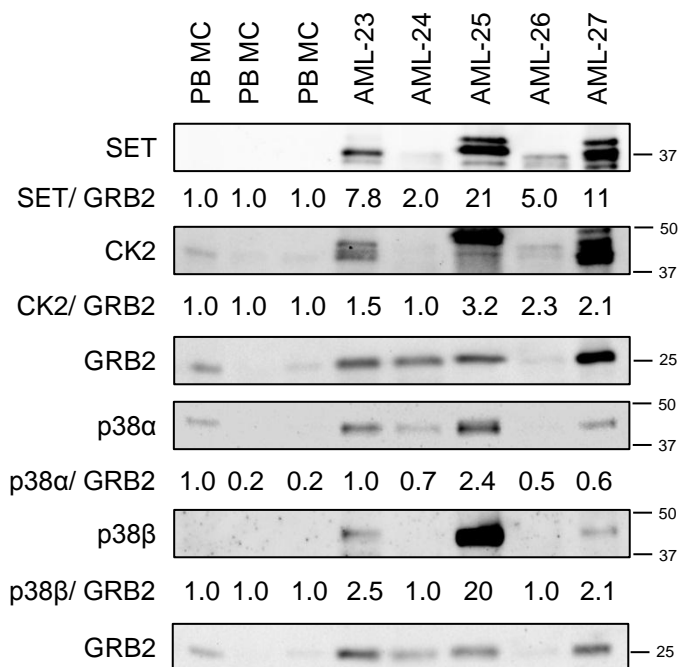

**Figure S2. p38β, CK2 and SET proteins are overexpressed in AML patient samples.** Western blot analysis of SET, p38α, p38β and CK2 from AML patient samples compared to peripheral blood mononuclear cells (PB MC).

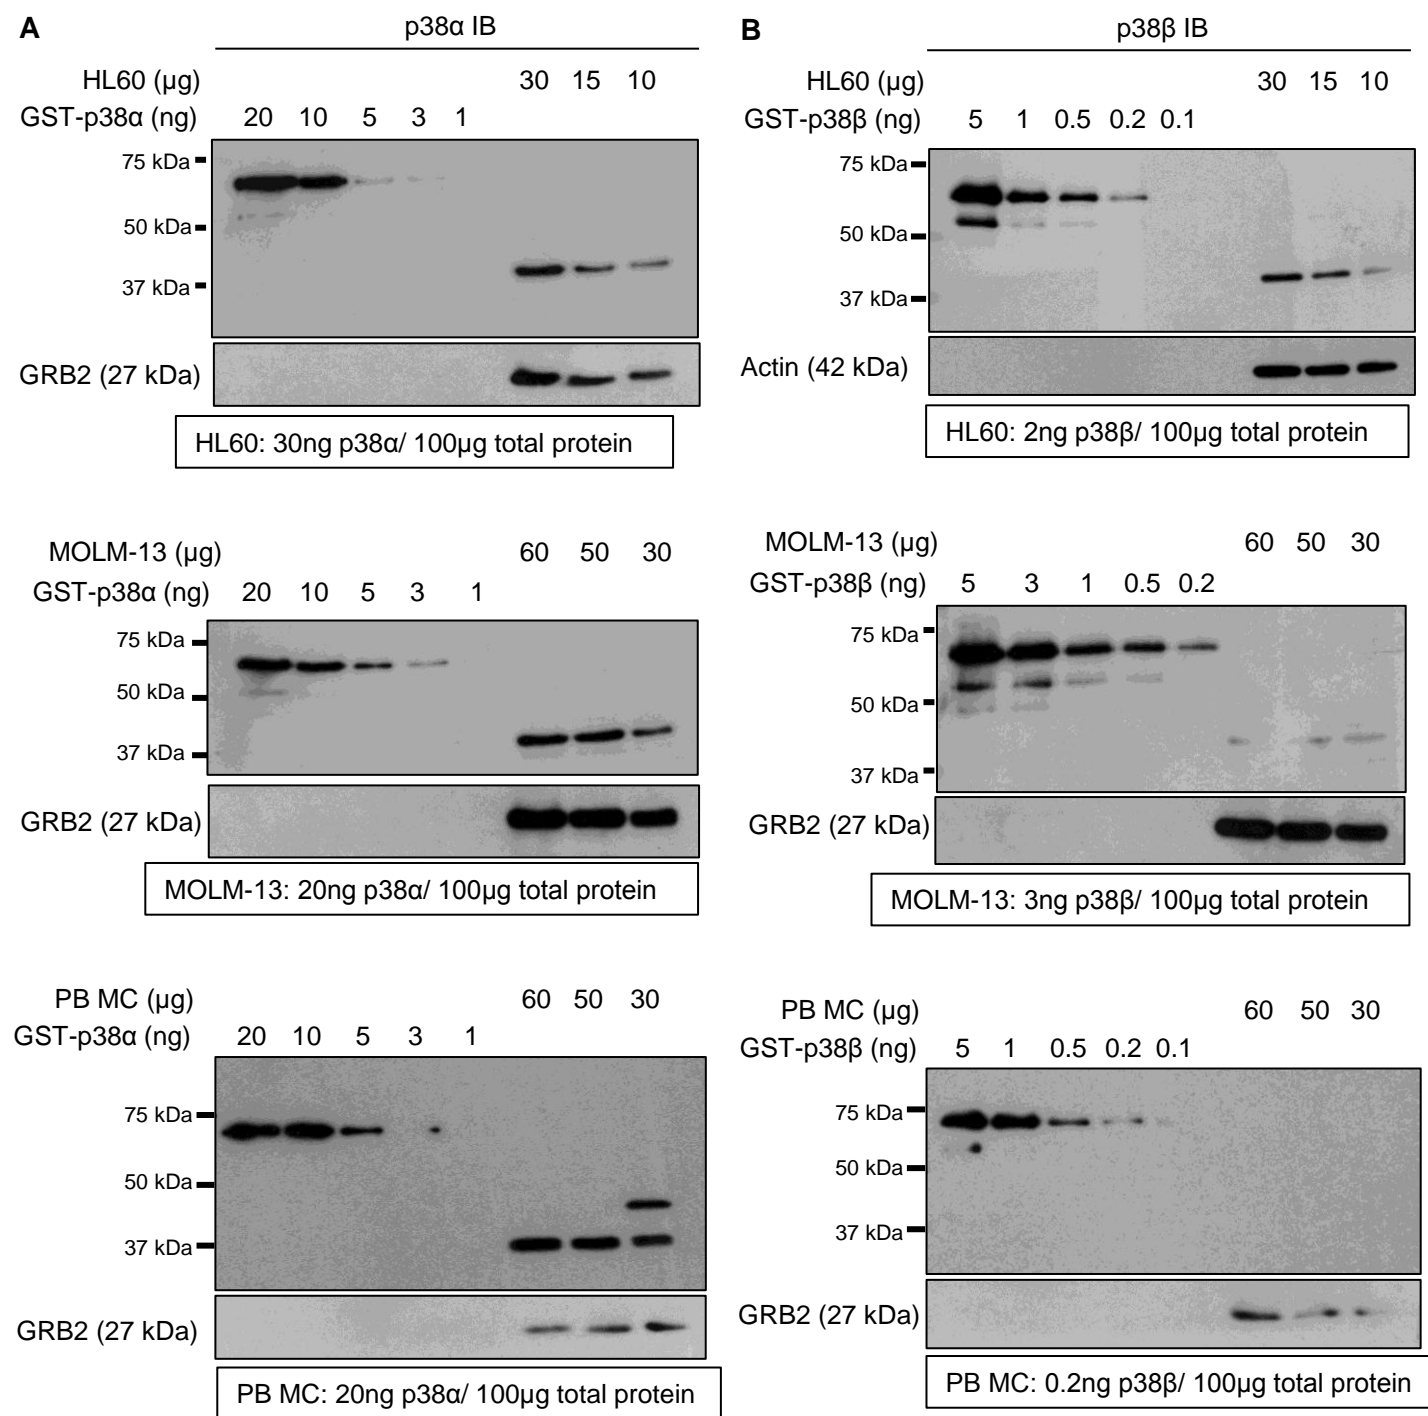

**Figure S3. Expression of p38 $\alpha$  and p38 $\beta$  in HL60, MOLM-13 and peripheral blood.** Quantitative western blot using known decreasing concentrations of GST-p38 $\alpha$  and GST-p38 $\beta$  compared to increasing concentration of cell lysates from HL60, MOLM-13 and peripheral blood mononuclear cells (PB MC). Western blot with specific antibodies and subsequent quantification was performed. **(A)** p38 $\alpha$  is expressed in a similar way in HL60, MOLM-13 and peripheral blood. **(B)** p38 $\beta$  is expressed in HL60 and MOLM-13 cell lines and not in PB MC.

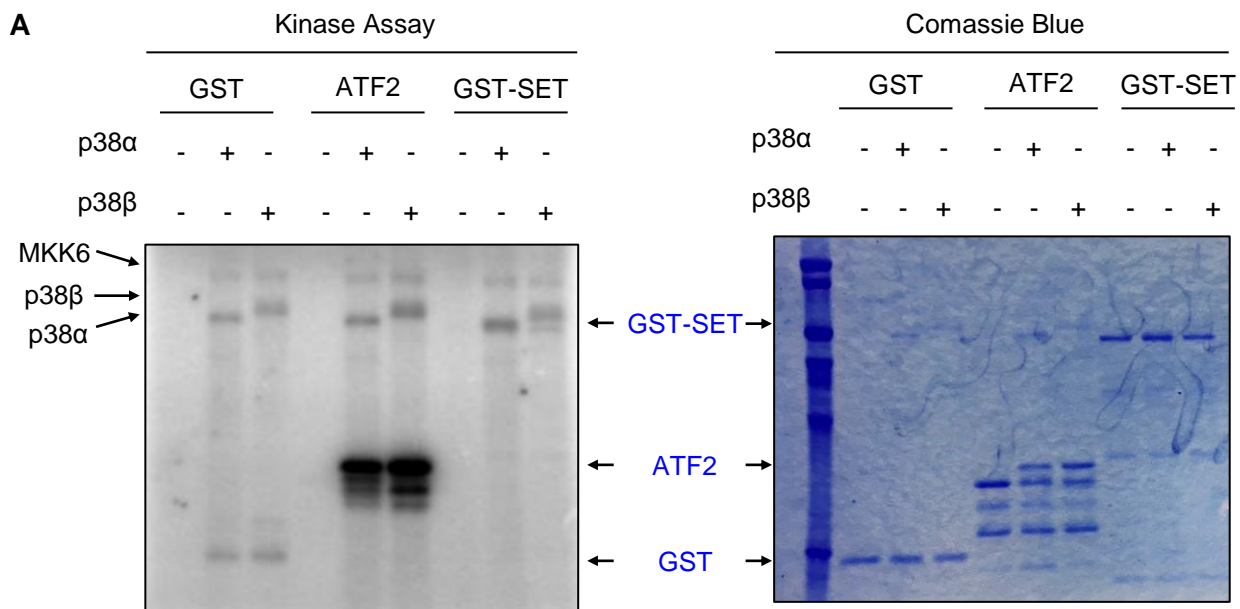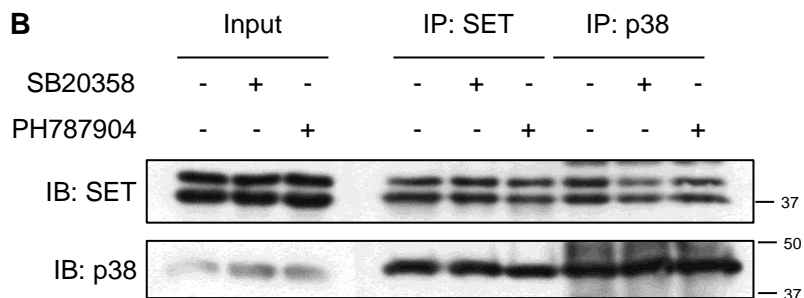

**Figure S4. p38MAPK does not phosphorylate directly SET and p38MAPK does not need to be active to bind to SET. (A)** *In vitro* kinase assay using p38 $\alpha$  or p38 $\beta$  and either GST (negative control), ATF2 (positive control) or GST-SET in the presence of  $^{32}\text{P}$ . p38 $\alpha$  and p38 $\beta$  were activated with MKK6. On the left autoradiography of the kinase assay; on the right comassie blue staining of the same gel. **(B)** HL60 were treated with p38MAPK inhibitors SB203580 (2.5 $\mu\text{M}$ , 24h) and PH787904 (1 $\mu\text{M}$ , 24h) and then, immunoprecipitation of SET and p38MAPK with specific antibodies was performed, followed by western blot.

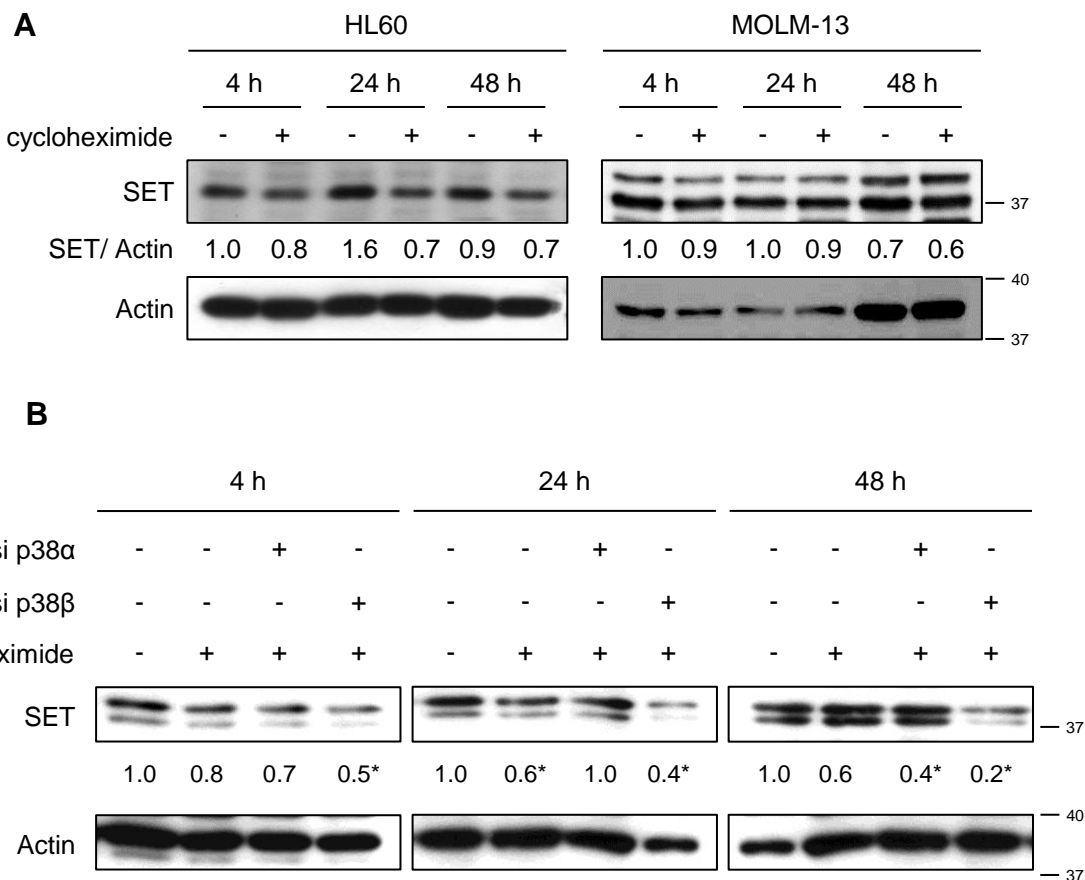

**Figure S5. Silencing of p38 $\beta$  decreases SET stability.** (A) HL60 and MOLM-13 cell lines were treated with 5 $\mu$ M of cycloheximide (CHX) for 4h, 24h and 48h to inhibit total protein synthesis, and SET protein was analyzed by western blot. (B) Silencing of p38 $\alpha$  and p38 $\beta$  with specific siRNA (50nM for 48h), in either the presence or absence of CHX (5 $\mu$ M, for 4, 24 or 48 h). Total protein was analyzed by western blot. The results are corrected by the specific loading control and are expressed as fold-change of the control, which are assigned a value of 100 and are mean values $\pm$ SEM. Experiments were performed in triplicate four times. \* $p$ <0.05, \*\*  $p$ <0.01.

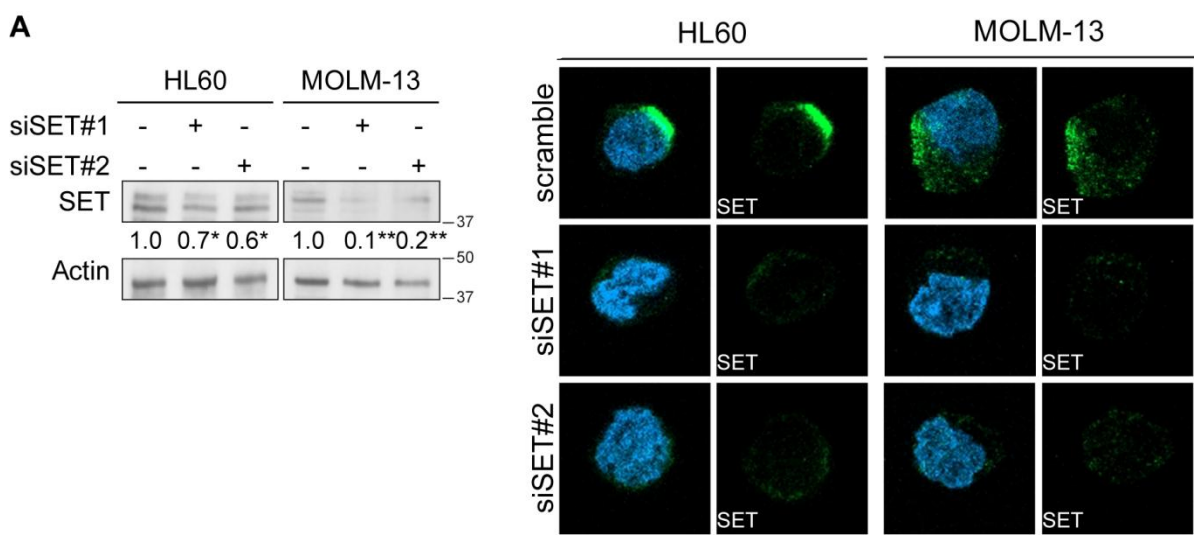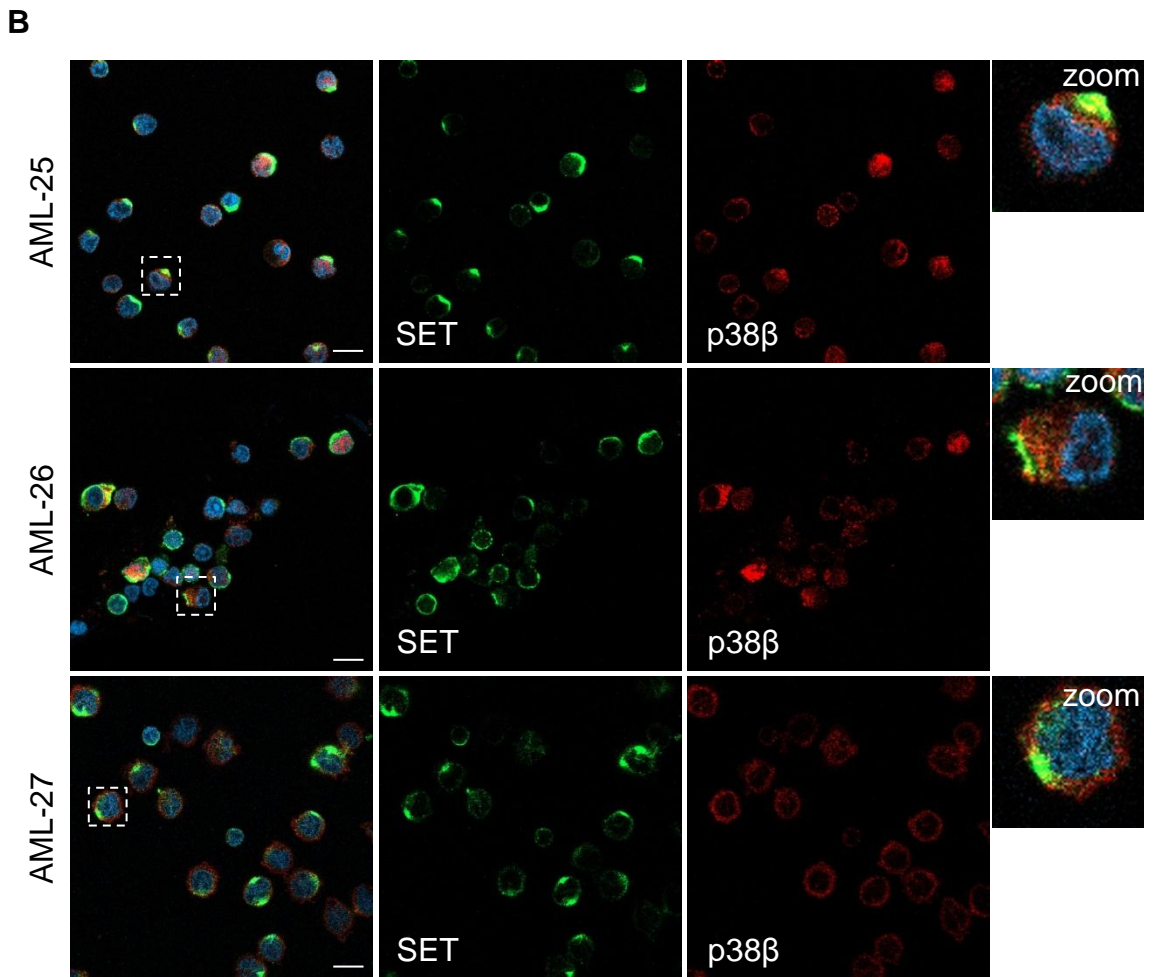

**Figure S6. SET co-localizes with p38 $\beta$  in AML patient samples. (A)** HL60 and MOLM-13 cells were silenced for SET with specific siRNAs (50nM for 72h). Total protein was analyzed by western blot. Immunofluorescence analysis of SET (green) in AML cells silenced for SET was performed as a control for SET antibody specificity. **(B)** Immunofluorescence analysis of SET (green) and p38 $\beta$  (red) co-localization in AML patient samples. Immunofluorescences were visualized by confocal microscopy. Scale bar represents 5  $\mu$ m.

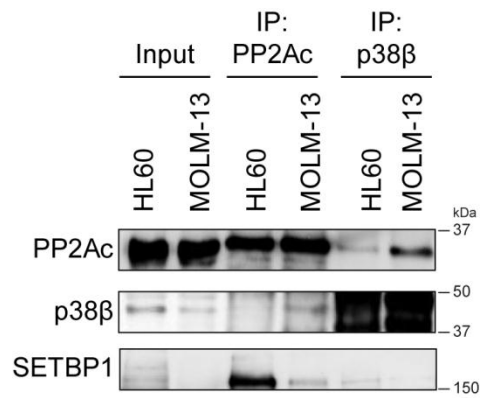

**Figure S7. SETBP1 immunoprecipitates along with PP2A2c and p38 $\beta$ .** Immunoprecipitation of PP2Ac or p38 $\beta$  and immunoblot of either PP2Ac, p38 $\beta$  or SETBP1 in HL60 and MOLM-13 cells. Experiments were performed in triplicate four times.



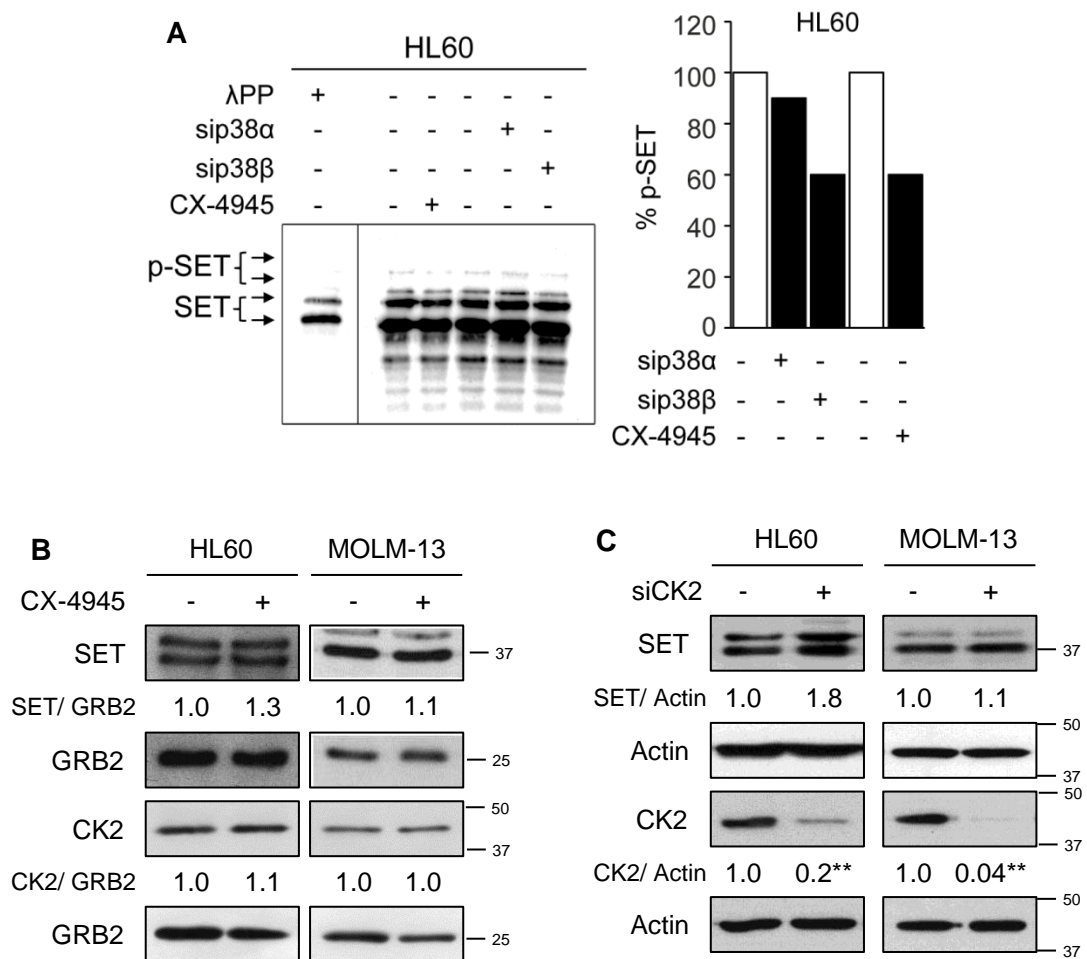

**Figure S8. CK2 inhibition does not alter SET total protein (A)** HL60 cells treated with either siRNA for silencing p38 $\alpha$  and p38 $\beta$  (50nM for 48h) or with the CK2 inhibitor CX-4945 (5 $\mu$ M, 24h) and analyzed for phospho-SET in a SDS-page with Phos-Tag<sup>TM</sup>. A control sample treated with  $\lambda$ PP (100 units, 1h) was used as control. **(B)** HL60 and MOLM-13 cell lines were treated with the CK2 inhibitor CX-4940 (5 $\mu$ M, 24h). Total protein expression of SET and CK2 was analyzed by western blot. **(C)** HL60 and MOLM-13 cells were treated with CK2 specific siRNA (20nM, 48h). Total protein expression of SET and CK2 was analyzed by western blot. The results are corrected by the specific loading control and are expressed as fold-change of the control, which are assigned a value of 1 and are mean values $\pm$ SEM. Experiments were performed in triplicate four times. \*\*  $p < 0.01$ . The results are corrected by the specific loading control and are expressed as fold-change of the control, which are assigned a value of 1 and are mean values $\pm$ SEM. Experiments were performed in triplicate four times. \* $p < 0.05$  \*\* $p < 0.01$ .

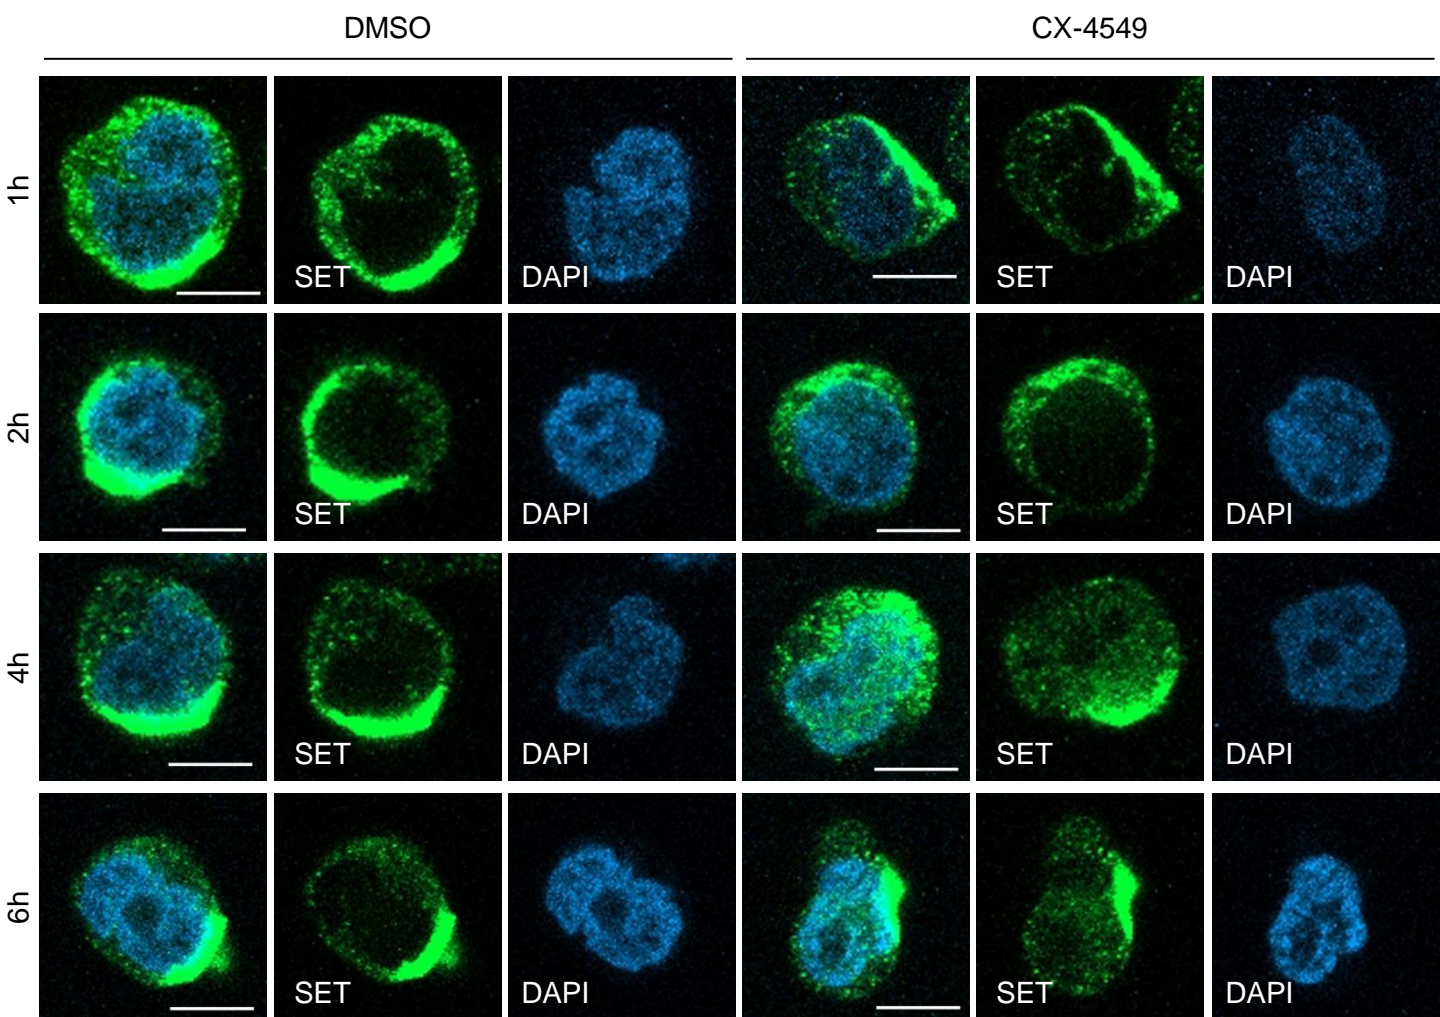

**Figure S9. Inhibition of CK2 increased SET in the nucleus 4 h after treatment.** Time course analysis of HL-60 cells treated with CX-4945 (CK2 inhibitor, 5 $\mu$ M) from 1h up to 6h. Immunofluorescence analysis of SET (green). Nuclei were stained with DAPI (blue). Immunofluorescences were visualized by confocal microscopy. Scale bar represents 5 $\mu$ m.

**A**

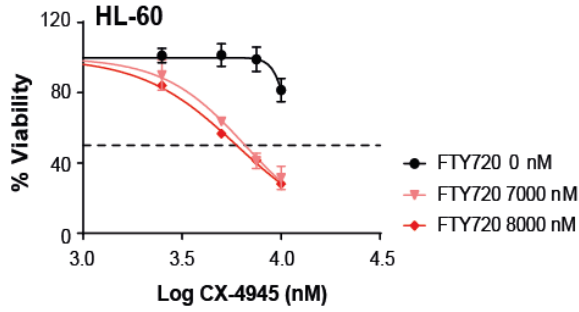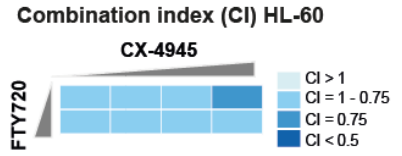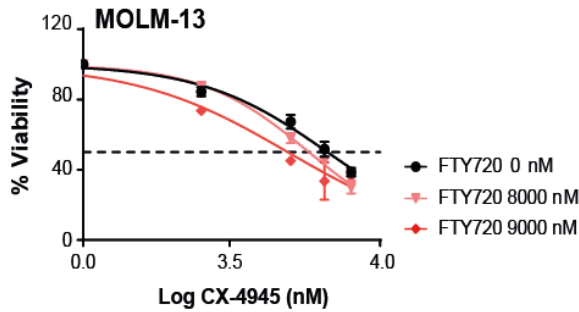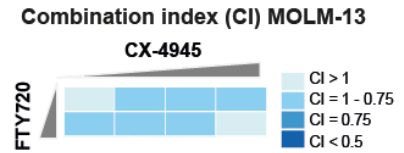

**B**

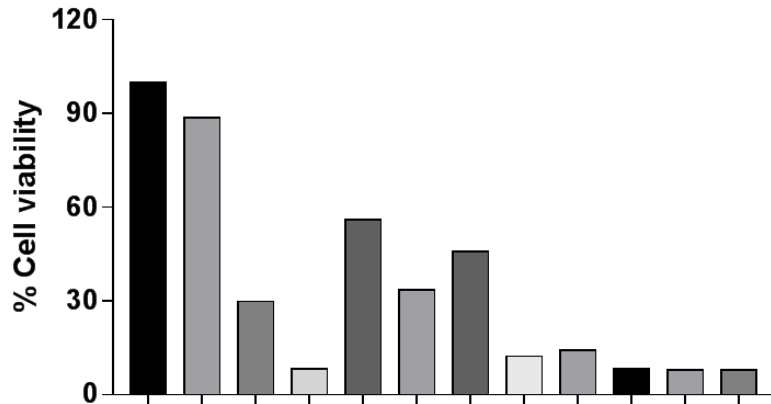

|               |   |   |   |   |   |   |   |   |   |   |   |   |
|---------------|---|---|---|---|---|---|---|---|---|---|---|---|
| FTY720 (5μM)  | - | + | - | - | - | - | + | + | - | - | - | - |
| FTY720 (8μM)  | - | - | + | - | - | - | - | - | + | + | - | - |
| FTY720 (10μM) | - | - | - | + | - | - | - | - | - | - | + | + |
| CX-4945 (5μM) | - | - | - | - | + | - | + | - | + | - | + | - |
| CX-4945 (8μM) | - | - | - | - | - | + | - | + | - | + | - | + |

**C**

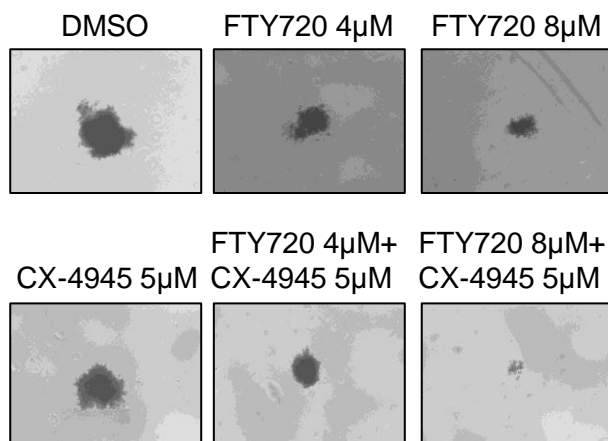

**Figure S10. Combination therapy of CX-4945 and FTY720 decreases viability and colony formation in primary AML patient samples representative cases. (A)** The GI50 (growth inhibition of 50%) of each compound was calculated using the data from the MTS assay in a non-linear regression model with the GraphPad Prism v7 software. To study the effect between these drugs, the GI50 of CX-4945 with different concentrations of FTY720 and vice versa were calculated. Combination Index (CI) values were calculated using the CompuSyn software (ref). The combined treatment was considered synergistic when the CI value was below 1. combination of CX-4945 and FTY720 resulted in a significant dose-dependent reduction of single treatment GI50 values in HL-60 and MOLM-13 cells. Furthermore, the calculated combination index values for the combined treatments were below 1 **(B)** Viability assay performed in AML-23 patient sample treated with CX-4945 (5 and 8  $\mu$ M) and FTY720 (5, 8 and 10  $\mu$ M) alone or in combination. Cell viability was measured by MTS analysis. The results are corrected by the DMSO control, which are assigned a value of 1 and are mean values $\pm$ SEM. **(C)** AML-26 patient sample cultured in semi-solid medium and treated with CX-4945 (5 $\mu$ M) and FTY720 (4 and 8  $\mu$ M), alone or in combination. Colony formation units (CFU) were counted 12 days after seeding. Representative pictures of CFU are shown.

**A**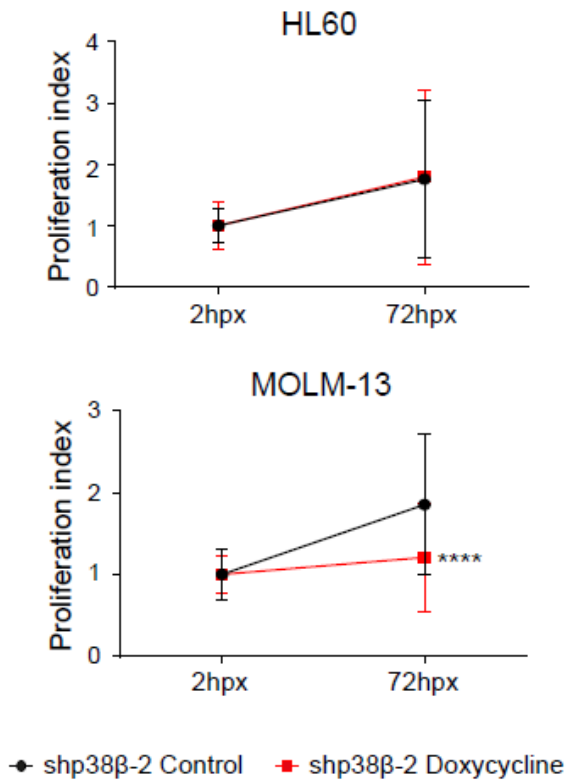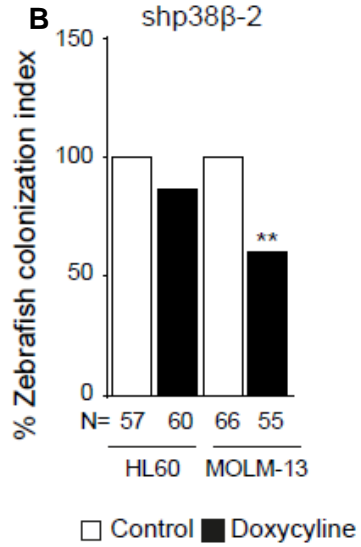

**Figure S11. p38 $\beta$  knockdown in HL60 and MOLM-13 cells decreases their proliferation and migration in a zebrafish xenograft model.** *In vivo* proliferation and invasive potential of HL60 and MOLM-13 cells upon infection with doxycycline shp38 $\beta$  vector and treatment with or without doxycycline were analyzed in a xenograft zebrafish model. **(A)** Measurement of proliferation index performed as fluorescence intensity medium value\* RF pixel; demonstrating cell proliferation of treated cells in the xenograft model. Two way ANOVA (Tukey's multiple comparisons test) done as statistic analysis. **(B)** Quantification of the invasive potential of the injected cells upon doxycycline treatment. Quantification performed as colonization index: count of zebrafish embryos with invasion of cells migrating outside the yolk sac referred to the control embryos. Statistical analysis done was Chi<sup>2</sup>. Hpx: hours post xenograft. \*\*  $p < 0.01$ , \*\*\* $p < 0.001$  vs. untreated cells.

**Table S1. Characteristics of the 23 AML patient samples.** Protein analysis was measured by western blot. High expression was considered as at least the double amount versus the control. ND: no data.

| Case   | Age | Gender | WHO 2016                                 | Karyotype                                                                           | Protein over expression |     |      |      |
|--------|-----|--------|------------------------------------------|-------------------------------------------------------------------------------------|-------------------------|-----|------|------|
|        |     |        |                                          |                                                                                     | SET                     | CK2 | p38α | p38β |
| AML-01 | 51  | M      | AML with inv(16)(p13.1q22); CBFB-MYH11   | 47,XY,inv(16)(p13q22),+22[23]/46,XY[2]                                              | Yes                     | No  | Yes  | Yes  |
| AML-02 | 73  | M      | AML with minimal differentiation         | 45,X,-Y[24]/46,XY[1]                                                                | Yes                     | No  | No   | No   |
| AML-03 | 72  | F      | Therapy-related myeloid neoplasms        | 46,XX[25]                                                                           | Yes                     | No  | No   | Yes  |
| AML-04 | 76  | F      | AML with maturation                      | 43,XX,-22,-18,der(12),-16[9]                                                        | No                      | No  | No   | Yes  |
| AML-05 | 35  | M      | AML with inv(16)(p13.1q22); CBFB-MYH11   | 46,XY,inv(16)(p13q22)[17]                                                           | Yes                     | Yes | No   | Yes  |
| AML-06 | 60  | F      | Acute myeloid leukemia, NOS              | 47,XX,-3, del(5)(q13-q33),+8,+21,+21[6]/48, idem,+20[3]                             | Yes                     | No  | No   | Yes  |
| AML-07 | 42  | F      | AML without maturation                   | 46,XX[20]                                                                           | Yes                     | Yes | No   | Yes  |
| AML-08 | 72  | M      | Acute monoblastic/monocytic leukaemia    | 46,XY[20]                                                                           | Yes                     | Yes | No   | Yes  |
| AML-09 | 82  | M      | Acute myeloid leukemia, NOS              | 46,XY[25]                                                                           | Yes                     | Yes | No   | Yes  |
| AML-10 | 33  | M      | Acute monoblastic/monocytic leukemia     | 46,XY[25]                                                                           | Yes                     | Yes | No   | Yes  |
| AML-11 | 50  | F      | Acute myeloid leukemia, NOS              | 45,XX,-21,add(22)(p13)[26]/90<4n>,-XXX,t(11;17)(q13;p13),-21,-21,add(22)(p13)x2[24] | Yes                     | Yes | Yes  | Yes  |
| AML-12 | 53  | M      | Acute myeloid leukemia, NOS              | 46,XY,t(4;10)(p15;q21),add(19)(q13)[29]/46,XY[1]                                    | Yes                     | No  | No   | Yes  |
| AML-13 | 83  | F      | AML with myelodysplasia-related changes  | 45,XX,del(5)(q13q33),t(11)(q10),del(16)(q21),-17,add(17)(p13)[30]                   | No                      | Yes | No   | Yes  |
| AML-14 | 77  | M      | AML with minimal differentiation         | 45,X,-Y[24]46,XY[7]                                                                 | Yes                     | Yes | No   | Yes  |
| AML-15 | 49  | F      | Therapy-related myeloid neoplasms        | 46,XX,t(2;12)(q31;p13),t(15;17)(q24;q21)[7]                                         | Yes                     | Yes | No   | Yes  |
| AML-16 | 49  | F      | AML with inv(16)(p13.1q22); CBFB-MYH11   | 46,XX,inv(16)(p13q22)[9]                                                            | Yes                     | Yes | No   | Yes  |
| AML-17 | 25  | F      | Acute myeloid leukemia, NOS              | ND                                                                                  | No                      | Yes | No   | No   |
| AML-18 | 62  | F      | AML with myelodysplasia-related changes  | ND                                                                                  | No                      | No  | No   | No   |
| AML-19 | 52  | M      | AML with maturation                      | 86-94[7]/46,XX[13]                                                                  | Yes                     | No  | No   | Yes  |
| AML-20 | 42  | M      | AML with t(8;21)(q22;q22); RUNX1-RUNX1T1 | 45,X,-Y,t(8;21)(q22;q22)[1]/46,XY[99]                                               | Yes                     | Yes | No   | No   |
| AML-21 | 77  | M      | AML with myelodysplasia-related changes  | 45,X,-Y[4]/44,X,-Y,add(7)(p22),-8[45]/46,XY[1]                                      | No                      | No  | No   | Yes  |
| AML-22 | 91  | M      | Acute myeloid leukemia, NOS              | null                                                                                | Yes                     | No  | No   | Yes  |
| AML-23 | 88  | M      | Acute myeloid leukemia, NOS              | ND                                                                                  | Yes                     | Yes | No   | Yes  |
| AML-24 | 62  | F      | Acute monoblastic/monocytic leukaemia    | 46,XX[20]                                                                           | Yes                     | No  | No   | No   |
| AML-25 | 88  | F      | Acute myeloid leukemia, NOS              | ND                                                                                  | Yes                     | Yes | Yes  | Yes  |
| AML-26 | 60  | F      | AML with myelodysplasia-related changes  | 45,XX,-7[20]                                                                        | Yes                     | Yes | No   | No   |
| AML-27 | 58  | F      | AML with myelodysplasia-related changes  | 46,XX[47,XX,+4][20]                                                                 | Yes                     | Yes | No   | Yes  |

**Table S2. List of commercially available reagent used**

| Reagent       | Ref#   | Source                | Concentration |
|---------------|--------|-----------------------|---------------|
| NVP-BEZ 235   | N-4288 | LC Laboratories       | 1 $\mu$ M     |
| SB203580      | S3400  | LC Laboratories       | 2.5 $\mu$ M   |
| PH797804      | S2726  | Selleckchem Chemicals | 250nM         |
| SP600125      | S7979  | LC Laboratories       | 1 $\mu$ M     |
| UO0126        | U-6770 | LC Laboratories       | 1 $\mu$ M     |
| Cycloheximide | 1810   | Sigma                 | 1 $\mu$ M     |
| CX-4945       | S2248  | Selleckchem Chemicals | 5 $\mu$ M     |
| FTY720        | S5002  | Selleckchem Chemicals | 5 $\mu$ M     |

**Table S3. List of commercially available antibodies used**

| Target                                                   | Ref#           | Source                   | Application |
|----------------------------------------------------------|----------------|--------------------------|-------------|
| Alexa fluor 488 donkey anti-goat                         | A-11055        | Invitrogen               | IF          |
| Alexa fluor 488 donkey anti-mouse                        | A21202         | Invitrogen               | IF          |
| Alexa fluor 555 donkey anti-rabbit                       | A31572         | Invitrogen               | IF          |
| Alexa fluor 568 donkey anti-mouse                        | A10037         | Invitrogen               | IF          |
| Amersham ECL Mouse IgG, HRP-iinked whole Ab (from sheep) | NA931          | Amersham                 | WB          |
| Anti-rabbit IgG, HRP-linked Antibody                     | 7074           | Cell signaling           | WB          |
| CK2 alpha                                                | PA5-28686      | Thermo                   | IF          |
| CK2 $\alpha$                                             | 05-1431        | Millipore                | WB          |
| Donkey anti-goat IgG HRP affinity purified PAB           | 04HAF109       | R&D systems              | WB          |
| GAPDH                                                    | 9484           | Abcam                    | WB          |
| GRB2                                                     | 610111         | BD                       | WB          |
| HSP27                                                    | 2402           | Cell signaling           | WB          |
| Lamin A/C                                                | 2032           | Cell signaling           | WB          |
| p38 $\alpha$                                             | 9218           | Cell signaling           | IP, WB      |
| p38 $\alpha$                                             | sc-535         | Santa Cruz Biotechnology | IF          |
| p38 $\beta$                                              | 2339           | Cell signaling           | IP, WB      |
| p38 $\beta$                                              | AB183208       | Abcam                    | IF          |
| Phospho-CK2A (Thr360/Ser362)                             | SAB4300628     | Sigma                    | WB          |
| Phospho-HSP27 (Ser78)                                    | E011247        | Enogene                  | WB          |
| PP2Ac                                                    | 05-421         | Millipore                | IF, IP, WB  |
| SET                                                      | sc-5655        | Santa Cruz Biotechnology | IF, IP, WB  |
| SETBP1                                                   | H00026040-B01P | Novus                    | IF          |
| $\beta$ -Actin                                           | A5441          | Sigma                    | WB          |
